# Supplementary material
Source: MDPI journal article supplement (https://www.mdpi.com/2077-0472/11/10/1006)
Supplement: s1 [file s1]

# Fragebogen zum Einfluss urbaner Kontexte auf Community Supported Agriculture (CSA) im städtischen Raum

Liebe Teilnehmerin, lieber Teilnehmer,

vielen Dank für Ihr Interesse und Ihre Beteiligung an unserer Untersuchung. Mit Ihrer Teilnahme tragen Sie zum Erfolg einer vergleichenden wissenschaftlichen Studie über CSAs in Österreich, Japan und Norwegen bei. Mittels des Projekts sollen Wege für eine nachhaltige Veränderung der Lebensmittelversorgung im städtischen Raum ermittelt werden. Die Bearbeitung des Fragebogens dauert etwa 15 Minuten. Eine vollständige und ehrliche Beantwortung aller Fragen ist für uns von großer Bedeutung. Es gibt keine richtigen und falschen Antworten. Wir interessieren uns ausschließlich für Ihre individuelle Einschätzung.

Wir danken Ihnen für Ihre Zeit und Ihre Mitarbeit,

Christina Gugerell und Marianne Penker (Universität für Bodenkultur, Wien)

Takeshi Sato und Daichi Toriyama (University of Tokyo)

Christine Hvitsand (Norwegian University of Life Sciences, Oslo)

## A Meine CSA-Teilnahme

### A1 Wie tragen Sie selbst zur CSA XX bei? (Mehrfachantworten möglich)

|      |                                                                                           |  |       |                                                                       |  |
|------|-------------------------------------------------------------------------------------------|--|-------|-----------------------------------------------------------------------|--|
| A1.1 | Mitgliedsbeitrag (und/oder andere finanzielle Beiträge)                                   |  | A1.6  | Vernetzung mit anderen Personen und Organisationen                    |  |
| A1.2 | Feldarbeit / Arbeit mit Tieren                                                            |  | A1.7  | Marketingaktivitäten (z.B. via Social Media, Newsletter, Flugblätter) |  |
| A1.3 | Administrative Tätigkeit (z.B. Eventorganisation, Papier- und Emailverkehr)               |  | A1.8  | Bildungsarbeit (z.B. Workshops, Informationsveranstaltungen)          |  |
| A1.4 | Management und Führung (z.B. Personalmanagement, Planung zukünftiger Entwicklung der CSA) |  | A1.9  | Anders, nämlich:                                                      |  |
| A1.5 | Verteilung der Ernte                                                                      |  | A1.10 | Gar nicht                                                             |  |

### A2 Wie viele Stunden pro Woche tragen Sie sich durchschnittlich zur CSA XX bei?

..... Stunden pro Woche in der Erntesaison

..... Stunden pro Woche außerhalb der Erntesaison

### A3 Wie sehr mögen Sie folgende Aktivitäten? Bitte bewerten Sie, wie sehr Sie die folgenden Aktivitäten mögen von 1 (ich mag die Aktivität nicht) bis 6 (ich mag die Aktivität sehr)

|      |                                                       | 1 | 2 | 3 | 4 | 5 | 6 | Ich weiß nicht |
|------|-------------------------------------------------------|---|---|---|---|---|---|----------------|
| A3.1 | Landwirtschaften, die Erde berühren, Pflanzen anbauen |   |   |   |   |   |   |                |
| A3.2 | In der Natur sein und die frische Luft spüren         |   |   |   |   |   |   |                |
| A3.3 | Gemeinschaftsaktivitäten in meiner Umgebung           |   |   |   |   |   |   |                |

### A4 Wie wichtig sind die folgenden Optionen, als Grund für Ihre Teilnahme an einer CSA? (Mehrfachantworten möglich)

|      |                                                                                                                      | 1 | 2 | 3 | 4 | 5 | 6 | Ich weiß nicht |
|------|----------------------------------------------------------------------------------------------------------------------|---|---|---|---|---|---|----------------|
| A4.1 | Erwerb von Bio-Produkten ab Hof                                                                                      |   |   |   |   |   |   |                |
| A4.2 | Erwerb von lokal produzierten Lebensmitteln                                                                          |   |   |   |   |   |   |                |
| A4.3 | Eine Verbindung mit der lokalen CSA Gemeinschaft haben                                                               |   |   |   |   |   |   |                |
| A4.4 | An einer landwirtschaftlichen Aktivität teilhaben                                                                    |   |   |   |   |   |   |                |
| A4.5 | Empathie für die Idee der CSA de Risikoaufteilung und der Gewährleistung eines sicheren Einkommens für LandwirtInnen |   |   |   |   |   |   |                |
| A4.6 | Verbindung mit der/dem CSA LandwirtIn (z.B., um über Pflanzen und Ökologie zu lernen)                                |   |   |   |   |   |   |                |
| A4.7 | Rückverfolgbarkeit der Lebensmittel und Transparenz der Produktion                                                   |   |   |   |   |   |   |                |
| A4.8 | Unabhängiger vom Agrarmarkt und dessen Preisen werden                                                                |   |   |   |   |   |   |                |
| A4.9 | Unterstützung der Entwicklung eines neuen und nachhaltigeren Agrarmarkts                                             |   |   |   |   |   |   |                |

**A5 CSAs sind Teil eines Lebensmittelsystems, das von Personen und Organisationen dominiert wird, die hauptsächlich eine Steigerung der Produktivität anvisieren.** Inwieweit stimmen Sie den nachfolgenden Aussagen zu? Bitte bewerten Sie, Ihre Zustimmung zu den folgenden Aussagen von 1 (ich stimme nicht zu) bis 6 (ich stimme völlig zu)

|      |                                                                                                                                                                                                  | 1 | 2 | 3 | 4 | 5 | 6 |
|------|--------------------------------------------------------------------------------------------------------------------------------------------------------------------------------------------------|---|---|---|---|---|---|
| A5.1 | Die CSA soll unabhängig und kleinstrukturiert bleiben, um eine Alternative zu den Produktions- und Marktmechanismen der dominierenden Personen und Organisationen im Lebensmittelsystem zu sein. |   |   |   |   |   |   |
| A5.2 | Die CSA soll mit dominierenden Personen und Organisationen im Lebensmittelsystem kooperieren und diese zu mehr Nachhaltigkeit anregen.                                                           |   |   |   |   |   |   |
| A5.3 | Die CSA soll sich an die Produktions- und Marktmechanismen dominierender Personen und Organisationen im Lebensmittelsystem anpassen, um schneller zu wachsen und um an Macht zu gewinnen.        |   |   |   |   |   |   |

**A6 Inwieweit empfinden Sie CSA als attraktiv?** Bitte bewerten Sie die Attraktivität von CSA zu den folgenden Aussagen von 1 (ich stimme nicht zu) bis 6 (ich stimme völlig zu)

|      |                       | 1 | 2 | 3 | 4 | 5 | 6 | Ich weiß nicht |
|------|-----------------------|---|---|---|---|---|---|----------------|
| A3.1 | Attraktivität von CSA |   |   |   |   |   |   |                |

## B Räumliche Kontexte der CSA

**B1 Wie gelangen Sie normalerweise zum CSA-Betrieb XX?** (Mehrfachantworten möglich)

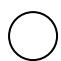

zu Fuß

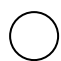

mit dem Rad

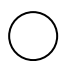

mit dem Auto

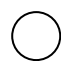

mit öffentlichen Verkehrsmitteln

**B2 Wie lange ist Ihre durchschnittliche Anreisezeit von Ihrem Zuhause zum CSA Betrieb XX?**

Minuten

.....

- B3 In welchem Ausmaß sind folgende Standortbedingungen für die CSA XX gegeben?** Bitte bewerten Sie das Ausmaß in dem folgende Standortbedingungen für die CSA gegeben sind von 1 (nicht gegeben) bis 6 (völlig gegeben)

|       |                                                                                                           | 1 | 2 | 3 | 4 | 5 | 6 | Ich weiß nicht |
|-------|-----------------------------------------------------------------------------------------------------------|---|---|---|---|---|---|----------------|
| B3.1  | Nähe des CSA-Hofs zur Stadt                                                                               |   |   |   |   |   |   |                |
| B3.2  | Anbindung an öffentliches Verkehrsnetz zum CSA-Hof                                                        |   |   |   |   |   |   |                |
| B3.3  | Gut ausgebautes Straßennetz zum Autofahren zum CSA-Hof                                                    |   |   |   |   |   |   |                |
| B3.4  | Gut ausgebautes Straßennetz zum Radfahren und zu Fuß gehen zum CSA-Hof                                    |   |   |   |   |   |   |                |
| B3.5  | Infrastruktur am CSA Betrieb (z.B. Wasseranschluss zum Gießen, Strom etc.)                                |   |   |   |   |   |   |                |
| B3.6  | Andere Gemeinschaftsaktivitäten in der Umgebung des CSA-Hofs                                              |   |   |   |   |   |   |                |
| B3.7  | Dienstleistungen in der Umgebung des CSA-Hofs (z.B. Tankstelle, Lagerhaus)                                |   |   |   |   |   |   |                |
| B3.8  | Vernetzungsmöglichkeiten in der Umgebung des CSA-Hofs (z.B. mit anderen CSAs und Lebensmittelinitiativen) |   |   |   |   |   |   |                |
| B3.9  | Verfügbarkeit von Grund und Boden                                                                         |   |   |   |   |   |   |                |
| B3.10 | Eignung von Boden und Klima für die Produktion                                                            |   |   |   |   |   |   |                |

- B4 Bitte erklären Sie die Wichtigkeit der oben gegebenen Standortbedingungen und die Herausforderungen im Bezug auf "optimale" Standortbedingungen" für Ihre CSA, wenn Sie möchten:**

.....

.....

## C Die CSA in einem breiteren gesellschaftlichen Kontext

- C1 Welche der folgenden Entwicklungen haben Ihrer Meinung nach auf den Erfolg der CSA XX einen negativen Einfluss? (Mehrfachantworten möglich)**

|      |                                                                                      |  |
|------|--------------------------------------------------------------------------------------|--|
| E1.1 | Abnehmender Zugang zu leistbarem Land                                                |  |
| E1.2 | Steigende Produktvielfalt von lokalen und biologischen Lebensmitteln im Supermarkt   |  |
| E1.3 | Zunahme der Supermarktdichte                                                         |  |
| E1.4 | Fallende Preise für biologische Lebensmittel im Supermarkt                           |  |
| E1.5 | Zunehmende alternative Möglichkeiten lokale und biologische Lebensmittel zu erwerben |  |
| E1.6 | Zunahme der landwirtschaftlichen Bio-Betriebe                                        |  |
| E1.7 | Zunahme der landwirtschaftlichen Betriebe mit Direktvermarktung                      |  |
| E1.8 | Keine davon                                                                          |  |
| E1.9 | Andere, nämlich:                                                                     |  |

**C2 Inwieweit stimmen sie folgenden Aussagen zu?** Bitte bewerten Sie, Ihre Zustimmung zu den folgenden Aussagen zustimmen von 1 (ich stimme nicht zu) bis 6 (ich stimme völlig zu)

|      |                                                                                                                                                                                                                    | 1 | 2 | 3 | 4 | 5 | 6 | Ich weiß nicht |
|------|--------------------------------------------------------------------------------------------------------------------------------------------------------------------------------------------------------------------|---|---|---|---|---|---|----------------|
| C2.1 | Die lokale Nachfrage nach biologisch und lokal produzierten Lebensmitteln steigt                                                                                                                                   |   |   |   |   |   |   |                |
| C2.2 | Mein Engagement bei der CSA ist mit meinen Alltagsroutinen gut vereinbar.                                                                                                                                          |   |   |   |   |   |   |                |
| C2.3 | Die Funktionsweise von CSAs ist für Nicht-CSA-Mitglieder leicht verständlich                                                                                                                                       |   |   |   |   |   |   |                |
| C2.4 | Das finanzielle Risiko einer CSA-Mitgliedschaft hält andere davon ab CSA-Mitglied zu werden.                                                                                                                       |   |   |   |   |   |   |                |
| C2.5 | In den Medien wird häufig über CSAs berichtet.                                                                                                                                                                     |   |   |   |   |   |   |                |
| C2.6 | Das lokale Interesse an CSAs steigt in den letzten Jahren.                                                                                                                                                         |   |   |   |   |   |   |                |
| C2.7 | Die Einstellung anderer gegenüber der CSA ist generell positiv (z.B. von anderen LandwirtInnen, KonsumentInnen etc.).                                                                                              |   |   |   |   |   |   |                |
| C2.8 | Die gegenwärtig dominierenden Personen und Organisationen im Lebensmittelsektor haben zu viel Macht, im Bezug darauf was produziert wird, wie es produziert wird und was in Lebensmittelgeschäften erhältlich ist. |   |   |   |   |   |   |                |
| C2.9 | Kooperationen über die CSA selbst hinausgehend, sind für die Förderung der nachhaltigen Entwicklung der Region wichtig.                                                                                            |   |   |   |   |   |   |                |

**C3 Bitte führen Sie Ihre Zustimmung/Ablehnung der Aussagen in Frage C2 zu, wenn Sie möchten:**

.....

.....

**D Interaktionen der CSA mit anderen Personen/Organisationen**

In Punkt D geht es um Interaktionen der CSA XX mit anderen CSAs, sowie anderen Personen und Organisationen. Wenn sie über keine Informationen bezüglich dieser Interaktionen verfügen, können Sie, wenn bevorzugt, Punkt C überspringen.

**D1 Welche Aktivitäten der CSA XX werden gemeinsam anderen CSAs in der Region durchgeführt?** (Mehrfachantworten möglich)

|      |                                                                                |  |       |                                                                                                   |  |
|------|--------------------------------------------------------------------------------|--|-------|---------------------------------------------------------------------------------------------------|--|
| D1.1 | Wissensaustausch (z.B. bzgl. Anbaumethoden etc.)                               |  | D1.7  | Online Kommunikation & Vernetzung mit anderen Personen und Organisationen (z.B. via Social Media) |  |
| D1.2 | Gemeinsame Lernprozesse (z.B. über die Führung einer CSA)                      |  | D1.8  | Öffentliche Bewusstseinsbildung (z.B. CSA als landwirtschaftliche Alternative)                    |  |
| D1.3 | Austausch von produzierten Lebensmitteln                                       |  | D1.9  | Administrative und koordinative Tätigkeiten                                                       |  |
| D1.4 | Austausch von Dienstleistungen (z.B. Mithilfe bei der Ernte etc.)              |  | D1.10 | Gemeinsamer Einkauf und Tausch von Samen und Jungpflanzen                                         |  |
| D1.5 | Austausch von Maschinen und technischen Geräten                                |  | D1.11 | Nichts davon                                                                                      |  |
| D1.6 | Persönliche Kommunikation & Vernetzung mit anderen Personen und Organisationen |  | D1.12 | Andere, nämlich:                                                                                  |  |

**C2 Wie oft ist die CSA XX mit anderen CSAs in der Region durchschnittlich in Kontakt?**

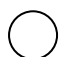

Fast täglich

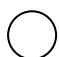

wöchentlich

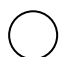

monatlich

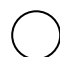

jährlich

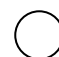

seltener als

**D3 In welchem Ausmaß wird die CSA XX von den folgenden Personen/Organisationen unterstützt?**

Bitte bewerten Sie die Stärke der Unterstützung aller Personen/Organisationen von 1 (gar keine Unterstützung) bis 6 (sehr starke Unterstützung)

|       |                                                                                               | 1 | 2 | 3 | 4 | 5 | 6 | Ich weiß nicht |
|-------|-----------------------------------------------------------------------------------------------|---|---|---|---|---|---|----------------|
| D3.1  | Lokalverwaltung (z.B. Magistrate, Grazer Stadtverwaltung)                                     |   |   |   |   |   |   |                |
| D3.2  | Behörden auf höherer Ebene (Land/Bund)                                                        |   |   |   |   |   |   |                |
| D3.3  | (Bio-) Landwirtschaftliche Organisationen (z.B. Landwirtschaftskammer Steiermark, Bauernbund) |   |   |   |   |   |   |                |
| D3.4  | Bio Austria                                                                                   |   |   |   |   |   |   |                |
| D3.5  | NGOs und zivilgesellschaftliche Gruppierungen                                                 |   |   |   |   |   |   |                |
| D3.6  | Politische Parteien                                                                           |   |   |   |   |   |   |                |
| D3.7  | Media (z.B. Fernsehen, Zeitungen, Blogs)                                                      |   |   |   |   |   |   |                |
| D3.8  | Religiöse Gemeinschaften                                                                      |   |   |   |   |   |   |                |
| D3.9  | Andere CSAs                                                                                   |   |   |   |   |   |   |                |
| D3.10 | Start-ups und innovative Initiativen (andere als CSAs)                                        |   |   |   |   |   |   |                |
| D3.11 | LandwirtInnen (ohne CSA-Zugehörigkeit)                                                        |   |   |   |   |   |   |                |
| D3.12 | Bauernmärkte                                                                                  |   |   |   |   |   |   |                |
| D3.13 | Lebensmittelgeschäfte                                                                         |   |   |   |   |   |   |                |
| D3.14 | Lebensmittelverarbeitungsbetriebe                                                             |   |   |   |   |   |   |                |
| D3.15 | Bildungseinrichtungen                                                                         |   |   |   |   |   |   |                |
| D3.16 | Privatpersonen                                                                                |   |   |   |   |   |   |                |
| D3.17 | Niemand davon                                                                                 |   |   |   |   |   |   |                |
| D3.18 | Andere, nämlich:                                                                              |   |   |   |   |   |   |                |

**D4 Im Falle einer Unterstützung: Welche der zuvor genannten Personen/Organisationen unterstützen die CSA XX mit welchen der folgenden Maßnahmen?**

Ordnen Sie die unterstützenden Personen/Organisationen, die Sie in der vorigen Frage angekreuzt haben, bitte den entsprechenden Maßnahmen, mit denen diese die CSA unterstützen, zu. (Mehrfachnennungen möglich)

|      | Maßnahmen                                                                | Unterstützende Personen und Organisationen |
|------|--------------------------------------------------------------------------|--------------------------------------------|
| D4.1 | Finanzielle Förderung                                                    |                                            |
| D4.2 | Bereitstellung von Fläche für Produktion und Verteilung der Lebensmittel |                                            |
| D4.3 | Bereitstellung von Infrastruktur                                         |                                            |
| D4.4 | Bereitstellung von Maschinen/Technischen Geräten                         |                                            |
| D4.5 | Weiterbildungs- und Beratungsangebot                                     |                                            |
| D4.6 | Vernetzungsmöglichkeiten                                                 |                                            |
| D4.7 | Andere Maßnahmen, und zwar:                                              |                                            |

**D5** In welchen Bereichen könnte die CSA XX von mehr Unterstützung durch andere Personen/Organisationen profitieren?

.....

.....

**D6** Was könnten andere Personen und Organisationen von CSAs lernen, um nachhaltiger zu werden?

.....

.....

**E Politische Kontexte der CSA**

In Punkt E geht es um politische Strukturen die Einfluss auf die CSA XX haben. Wenn sie über keine Informationen bezüglich dieser Interaktionen verfügen, können Sie, wenn bevorzugt, Punkt C überspringen.

**E1** In welchem Ausmaß ist die derzeitige rechtliche Situation unterstützend oder behindert für die Entstehung und Existenz von CSAs? Bitte bewerten sie die Stärke der Unterstützung oder Behinderung von 1 (starke Behinderung) bis 6 (starke Unterstützung)

|    |                                 | 1 | 2 | 3 | 4 | 5 | 6 | Ich weiß von keiner Unterstützung oder Behinderung |
|----|---------------------------------|---|---|---|---|---|---|----------------------------------------------------|
| E1 | Derzeitige rechtliche Situation |   |   |   |   |   |   |                                                    |

**E2** Wenn ja, erläutern Sie bitte kurz, welche Hindernisse sich durch diese Gesetzeslage für die Entstehung und das Fortbestehen von CSAs ergeben?

.....

.....

**E3** Welche gesetzlichen Anpassungen, haben in der Vergangenheit die Entstehung und das Fortbestehen von CSAs erleichtert?

.....

.....

**F Angaben zu Ihrer Person**

**F1** Bitte geben Sie Ihr Geschlecht an:

☐ weiblich      ☐ männlich      ☐ divers

**F2** Bitte geben Sie Ihr Geburtsjahr an:

.....

**F3** Bitte geben Sie Ihre Postleitzahl an:

.....

**F4** Bitte geben Sie Ihre Haushaltsgröße an:      Personen, davon Kinder unter 15 Jahren

.....

**F5** Bitte geben Sie Ihr durchschnittliches Haushaltseinkommen pro Jahr (brutto) an:

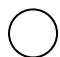

Unter 15.000 €

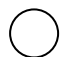

15.100-30.000 €

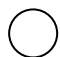

30.100-45.000 €

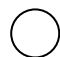

45.100-60.000 €

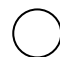

Über 60.000 €

**F6 Bitte geben Sie Ihre höchste abgeschlossene Ausbildung an:**

|      |                                       |  |
|------|---------------------------------------|--|
| F6.1 | Allgemeine Pflichtschule              |  |
| F6.2 | Lehre/Berufsbildende mittlere Schulen |  |
| F6.3 | AHS/BHS                               |  |
| F6.4 | Universität/FH                        |  |
| F6.5 | Andere nämlich:                       |  |

**F7 Bitte geben Sie Ihre derzeitige Arbeitssituation an:**

|      |                                                    |  |
|------|----------------------------------------------------|--|
| F7.1 | Vollzeitbeschäftigt (als Angestellte/r, Beamte/r)  |  |
| F7.2 | Teilzeitbeschäftigt ( als Angestellte/r, Beamte/r) |  |
| F7.3 | Selbstständige/r                                   |  |
| F7.4 | Studierend                                         |  |
| F7.5 | Pensioniert                                        |  |
| F7.6 | Erwerbslos                                         |  |
| F7.7 | Anders, nämlich:                                   |  |

**F8 Wie viele Bücher lesen Sie normalerweise? Bitte wählen Sie die am ehesten zutreffende Option.**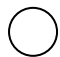

1 Buch/Tag

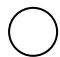

1 Buch/Woche

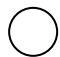

1 Buch/Monat

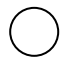

1 Buch/Jahr

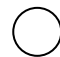

weniger als 1 Buch/Jahr

**F9 Für den Fall, dass Sie an anderen gemeinschaftlichen Aktivitäten außerhalb der CSA teilhaben, geben Sie bitte diese Aktivitäten und die Häufigkeit (Stunden/Woche) mit der Sie diese betreiben an.**

Aktivität:

.....

Stunden/Woche:

.....

Aktivität:

.....

Stunden/Woche:

.....

Aktivität:

.....

Stunden/Woche:

.....

**F10 Wollen Sie uns noch etwas mitteilen?**

.....

.....

**F11 Wenn Sie über die Ergebnisse der Studie informiert werden möchten, geben Sie bitte Ihre E-Mail-Adresse an:**

.....
